# Supplementary material for: Geometry of OH⋯O interactions in the liquid state of linear alcohols fromab initiomolecular dynamics simulations
Source: Royal Society of Chemistry journal article supplement (doi:10.1039/d0cp00435a), 2020-01-01
Supplement: d0cp00435a1.pdf [file d0cp00435a1.pdf]

## Electronic Supplementary Information

### Contents

**S1:** Simulation cell parameters for liquid alcohols.

**S2:** DFT functional validation: comparison of experimental and calculated partial radial distribution functions,  $g_{OO}$  and  $g_{OH}$  for methanol using BLYP, HCTH and PBE functional.

**S3:** Simulation cell and comparison of calculated and experimental radial distribution function (rdf) and partial rdfs,  $g_{H1H1}$ ,  $g_{XH1}$  and  $g_{XX}$  of ethanol.

**S1:** Simulation cell parameters for liquid alcohols.

**Table-S1:** Simulation cell parameters for alcohols in liquid state

|          | Number of Molecules | Box dimension (Å) | Experimental density <sup>1</sup> (gcm <sup>-3</sup> ) |
|----------|---------------------|-------------------|--------------------------------------------------------|
| Methanol | 100                 | 18.86             | 0.792                                                  |
| Ethanol  | 100                 | 21.32             | 0.789                                                  |
| Propanol | 100                 | 23.16             | 0.803                                                  |
| Butanol  | 100                 | 24.76             | 0.810                                                  |
| Pentanol | 100                 | 26.19             | 0.814                                                  |

**S2:** DFT functional validation: comparison of experimental and calculated partial radial distribution functions,  $g_{OO}$  and  $g_{OH}$  for methanol using BLYP, HCTH and PBE functional.

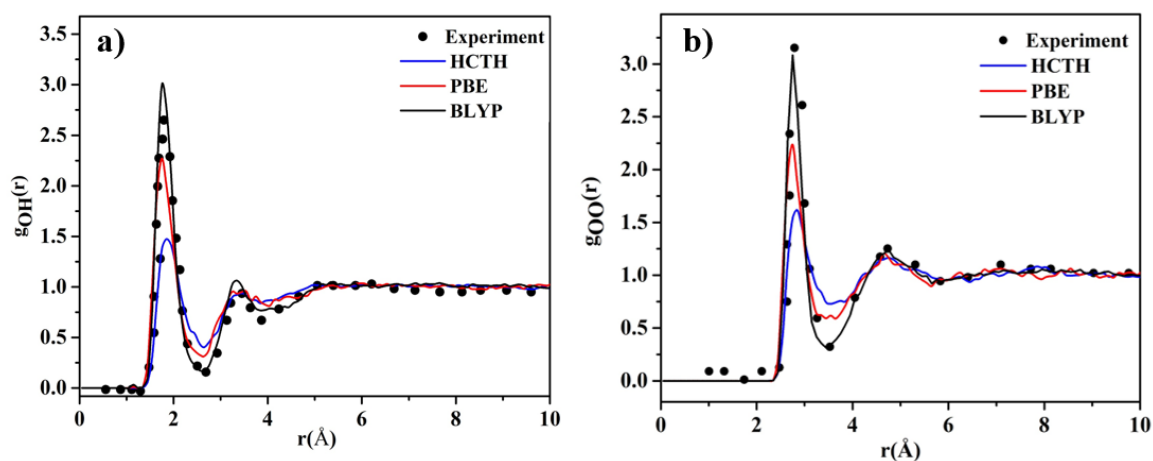

**Figure S1:** Comparison of prdfs calculated using different DFT functional for liquid methanol a) The non-bonded -O to hydroxyl proton -H,  $g_{OH}$  b) The non-bonded -O to -O rdf function,  $g_{OO}$ .

**S3:** Simulation cell and comparison of calculated and experimental radial distribution function (rdf) and partial rdFs,  $g_{\text{H1H1}}$ ,  $g_{\text{XH1}}$  and  $g_{\text{XX}}$  of ethanol.

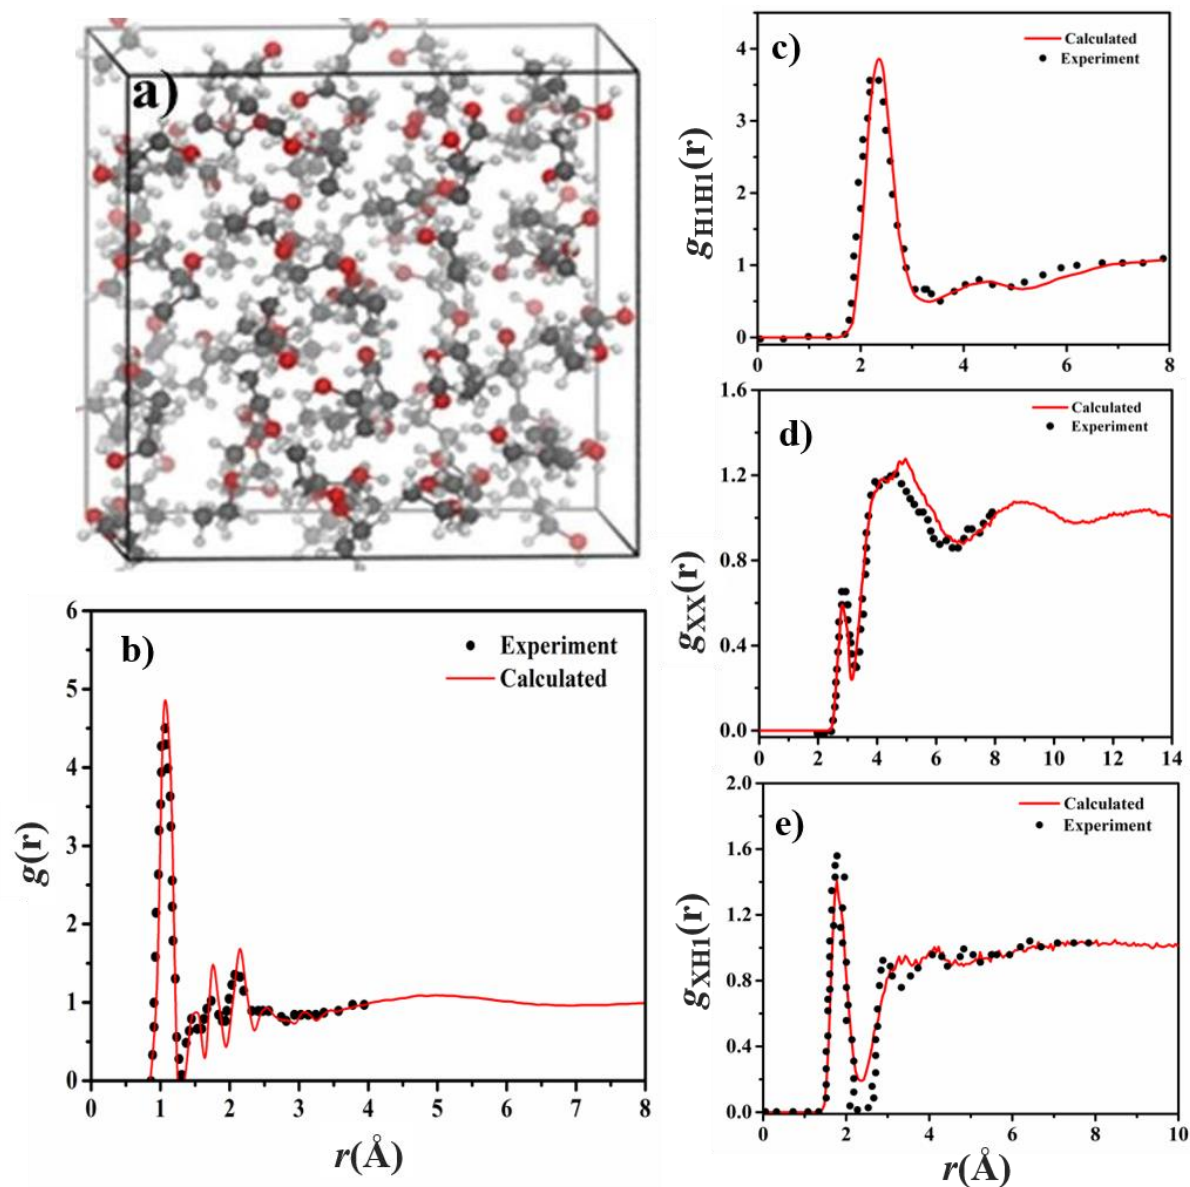

**Figure S2:** a) Snapshot of post-equilibration simulation cell for ethanol. Comparison of radial distribution function (rdf) b)  $g(r)$ , and prdFs of ethanol in liquid state calculated using CPMD simulation with BLYP functional and neutron scattering data.<sup>2,3</sup> c)  $g_{\text{H1H1}}$  d)  $g_{\text{XX}}$  e)  $g_{\text{XH1}}$ . Here X and H1 refers to non-hydrogen atoms (C & O) and hydroxyl protons, respectively.

## References

- 1 B. González, N. Calvar, E. Gómez and Á. Domínguez, Density, dynamic viscosity, and derived properties of binary mixtures of methanol or ethanol with water, ethyl acetate, and methyl acetate at T=(293.15, 298.15, and 303.15)K, *J. Chem. Thermodyn.*, 2007, **39**, 1578–1588.
- 2 C. J. Benmore and Y. L. Loh, The structure of liquid ethanol: A neutron diffraction and molecular dynamics study, *J. Chem. Phys.*, 2000, **112**, 5877–5883.
- 3 D. G. Montague, I. P. Gibson and J. C. Dore, Structural studies of liquid alcohols by neutron diffraction, *Mol. Phys.*, 1982, **47**, 1405–1416.
